# Supplementary material for: Photo-induced semimetallic states realised in electron–hole coupled insulators
Source: PubMed Central journal article supplement (PMC6192982; doi:10.1038/s41467-018-06801-1), 2018-10-17
Supplement: 41467_2018_6801_MOESM3_ESM.pdf [file 41467_2018_6801_MOESM3_ESM.pdf]

## **Description of Additional Supplementary Files**

File Name: Supplementary Movie 1

Description: Movie of the temporal evolution of TARPES spectra of Ta<sub>2</sub>NiSe<sub>5</sub>.

File Name: Supplementary Movie 2

Description: Movie of the temporal evolution of TARPES spectra of Ta<sub>2</sub>NiS<sub>5</sub>.
